# Supplementary material
Source: Springer Nature journal article supplement (https://www.springermedizin.de/resource/supplementary/13012_2013_724_MOESM2_ESM.pdf/9630646)

**Involving frontline staff  
in improving practice  
quality & safety**

# TEAM WORK

Knowledge users: clinicians,  
policy makers, QI experts  
Researchers: anthropologist,  
psychologist, QI, clinical research

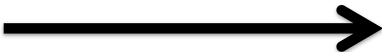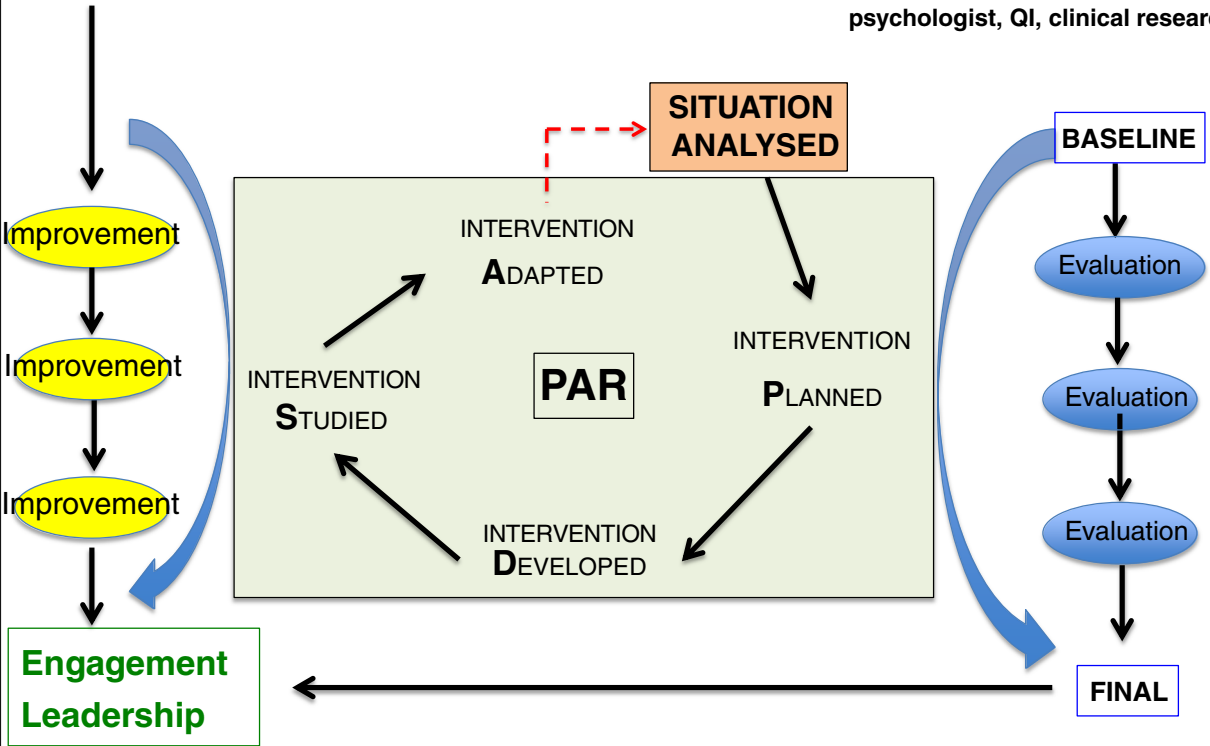

Supplement: MOESM2 [file 9630646]
